# Supplementary material
Source: ML conference proceedings conference paper supplement (https://openaccess.thecvf.com/content/CVPR2026/html/Gao_Resolving_Endpoint_Underfitting_CVPR_2026_paper.html)
Supplement: Supplementary file 1 [file Gao_Resolving_Endpoint_Underfitting_CVPR_2026_supplemental.pdf]

# Resolving Endpoint Underfitting in Diffusion Bridges via Noise Alignment

## Supplementary Material

### 7. Sampling Procedure

Since the training objective enables the prediction of the initial image  $X_0$  from any noisy state  $X_t$ , we design the corresponding sampling distribution to ensure that samples progressively denoise along the interpolation path. Let  $\{t_i\}_{i=0}^N$  represent a partition of the unit interval  $[0, 1]$ , where  $t_0 = 0$ ,  $t_N = 1$ , and  $t_i < t_{i+1}$  for all  $i = 0, \dots, N$ . Our sampling framework operates by coordinating the use of two distinct conditional distributions: the standard reverse transition  $p(X_{t-1} | X_0^\epsilon, X_t)$  and the endpoint-conditioned distribution  $p(X_{t-1} | X_0^\epsilon, \hat{X}_0, X_t)$ . Specifically, we adopt a partitioned approach that applies different conditional distributions over distinct temporal regions. The standard reverse transition is used over the interval over the interval  $[t_i, t_N]$ , while the endpoint-conditioned distribution is employed over the complementary interval  $[t_0, t_i]$ . This formulation eliminates the intermediate step of solving for  $x_0^\epsilon$  from the network output  $\epsilon_\theta$ . We refer to this sampling method as a two-stage sampling strategy, implemented as follows:

#### 7.1. The First Stage

We use  $X_{t_{i-1}} \sim p(X_{t_{i-1}} | X_0^\epsilon, X_{t_i})$  from  $t = 1$  to  $t = t_i$ . The conditional probability distribution can be expressed in its reparameterized form as:

$$X_{t_{i-1}} = X_{t_i} - \epsilon_\theta \Delta_t + \sigma_t Z, \quad (15)$$

where  $\sigma_t = \sqrt{[kt_{i-1}(1-t_{i-1})]^2 - [kt_{i-1}^\alpha t_i^{1-\alpha}(1-t_i)]^2}$ ,  $\Delta_t = t_i^\alpha - t_{i-1}^\alpha$ ,  $t_{i-1} \geq \frac{1-\alpha}{2-\alpha}$ . It is important to note that this formulation is only valid within the interval  $[\frac{1-\alpha}{2-\alpha}, 1]$ , which constitutes the fundamental rationale for our two-stage sampling approach. Derivation of Eq. (15) can be found in Sec. 7.3.

#### 7.2. The Second Stage

The direct application of Eq. (15) over the interval  $[0, \frac{1-\alpha}{2-\alpha}]$  is prohibited due to the non-negativity requirement of its standard deviation term  $\sigma_t$ . To overcome this limitation, we introduce a hyperparameter  $w$  into the noise term of  $X_{t_{i-1}} \sim p(X_{t_{i-1}} | X_0^\epsilon, \hat{X}_0, X_{t_i})$ , yielding the modified expression:

$$X_{t_{i-1}} = a\epsilon_\theta - bX_{t_i} + c\hat{X}_0 + \sigma_{wt}Z, \quad (16)$$

where

$$\begin{aligned} a &= t_i^\alpha (w + t_{i-1}^\alpha - 1 - wt_i^\alpha), \\ b &= t_{i-1}^\alpha - 1 - wt_i^\alpha, \\ c &= t_{i-1}^\alpha - wt_i^\alpha, \end{aligned} \quad (17)$$

$$\sigma_{wt} = \sqrt{[kt_{i-1}(1-t_{i-1})]^2 - [kwt_i(1-t_i)]^2}.$$

It should be noted that Eq. (16) remains valid over the entire interval  $[0, 1]$ . This allows the value of  $t_i$  to be flexibly chosen (as long as  $t_i \geq \frac{1-\alpha}{2-\alpha}$ ) in order to determine the specific subinterval over which Eq. (16) is applied. We set the partition point  $d$  between the two sampling stages to  $\frac{1-\alpha}{2-\alpha}$  by default. The hyperparameter  $w$  controls the magnitude of  $\sigma_t$ , thereby determining the amount of stochastic noise introduced over the interval  $[0, t_i]$ . When  $\sigma_t = 0$ , the sampling process within this interval reduces to a deterministic trajectory. In our experiments, we set  $w = \frac{t_{i-1}}{t_i}$  to evaluate the impact of varying noise levels on the final output. Derivation of Eq. (16) can be found in Sec. 7.3.

#### 7.3. Derivation of Sampling Procedure

*Proof.* Our derivation leverages the reparameterization technique. For  $s < t$ , we define the process as:

$$X_s = X_t - \frac{X_t - X_0^\epsilon}{t^\alpha} \Delta_t + \sigma_t Z \quad (18)$$

$$= \frac{\Delta_t}{t^\alpha} X_0^\epsilon + \frac{t^\alpha - \Delta_t}{t^\alpha} X_t + \sigma_t Z. \quad (19)$$

According to the calculation rules of reparameterization, the coefficients of Gaussian noise in the left and right equations are equal, and we obtain the following equations:

$$\frac{\Delta_t}{t^\alpha} = 1 - t^\alpha, \quad (20)$$

$$[ks(1-s)]^2 = \left[ \frac{t^\alpha - \Delta_t}{t^\alpha} \cdot kt(1-t) \right]^2 + \sigma_t^2. \quad (21)$$

Solving this system yields  $\Delta_t = t^\alpha - s^\alpha$  and  $\sigma_t = \sqrt{[ks(1-s)]^2 - [ks^\alpha t^{1-\alpha}(1-t)]^2}$ .

The non-negativity constraint  $\sigma_t \geq 0$  implies  $s \geq \frac{1-\alpha}{2-\alpha}$ , and thus  $d \geq \frac{1-\alpha}{2-\alpha}$ .

For the second stage from  $t = d$  to  $t = 0$ , we introduce a hyperparameter  $w$  and define  $\sigma_{wt} = \sqrt{[ks(1-s)]^2 - [wkt(1-t)]^2}$ . Using reparameterization:

$$X_s = (1 - s^\alpha)X_0^\epsilon + s^\alpha \hat{X}_0 + ks(1-s)Z \quad (22)$$

$$= (1 - s^\alpha)X_0^\epsilon + s^\alpha \hat{X}_0 + \sigma_{wt}Z + wkt(1-t)Z, \quad (23)$$

Table 5. Comparison with PMRF in numerous image restoration tasks.

| Method | JPEG Restoration |     |      |       |       |        | 4× Super-Resolution |     |      |       |       |        | Deblurring |     |      |       |       |        |
|--------|------------------|-----|------|-------|-------|--------|---------------------|-----|------|-------|-------|--------|------------|-----|------|-------|-------|--------|
|        | QF               | NFE | FID↓ | PSNR↑ | SSIM↑ | LPIPS↓ | Filter              | NFE | FID↓ | PSNR↑ | SSIM↑ | LPIPS↓ | Kernel     | NFE | FID↓ | PSNR↑ | SSIM↑ | LPIPS↓ |
| PMRF   | 5                | 10  | 7.6  | 24.62 | 0.69  | 0.31   | Pool                | 10  | 5.1  | 25.24 | 0.73  | 0.21   | Uniform    | 10  | 6.6  | 27.84 | 0.82  | 0.20   |
| NADB   |                  |     | 6.9  | 24.45 | 0.69  | 0.30   |                     |     | 5.3  | 24.75 | 0.71  | 0.23   |            |     | 4.8  | 27.70 | 0.81  | 0.18   |
| PMRF   | 100              |     | 7.8  | 23.69 | 0.64  | 0.32   | 100                 |     | 4.5  | 24.03 | 0.69  | 0.21   | 100        |     | 7.2  | 27.53 | 0.81  | 0.21   |
| NADB   |                  |     | 4.3  | 23.63 | 0.65  | 0.30   |                     |     | 3.7  | 23.63 | 0.67  | 0.22   |            |     | 3.4  | 27.39 | 0.80  | 0.17   |

and substituting the identity  $wkt(1-t)Z = w[X_t - (1-t^\alpha)X_0^\epsilon - t^\alpha\hat{X}_0]$ , we rearrange to express  $X_s$  in terms of  $X_t$ ,  $X_1$  and  $Z$ :

$$X_s = [wt^\alpha - s^\alpha + 1]X_t + (s^\alpha - wt^\alpha)\hat{X}_0 + \sigma_{wt}Z \quad (24)$$

$$+ t^\alpha [s^\alpha - 1 + w(1-t^\alpha)] \cdot \frac{X_t - X_0^\epsilon}{t^\alpha}. \quad (25)$$

This completes the derivation.  $\square$

## 8. Proof of Theorem 2

**Theorem 3.** Let  $\rho_0$  be the target distribution,  $\rho_1$  the degraded distribution, and  $\hat{\rho}_0$  the output distribution of the mean network  $M_\phi$  optimized via Eq. (11). The mean network reduces the distributional gap in the Wasserstein-2 sense:

$$W_2(\rho_0, \hat{\rho}_0) \leq W_2(\rho_0, \rho_1). \quad (26)$$

*Proof.* Given  $(X_0, X_1) \sim (\rho_0, \rho_1)$  and  $\hat{X}_0 = M_\phi(X_1) = \mathbb{E}(X_0 | X_1)$ , there exists:

$$\mathbb{E}[\|X_0 - \hat{X}_0\|^2] \leq \mathbb{E}[\|X_0 - X_1\|^2]. \quad (27)$$

Eq. (27) can be verified by expanding the square on the left-hand side. Using the definition of Wasserstein-2 distance and Eq. (27), we obtain:

$$W_2^2(\rho_0, \rho_1) = \inf_{\gamma \in \Pi(\rho_0, \rho_1)} \mathbb{E}_{(X_0, X_1) \sim \gamma} [\|X_0 - X_1\|^2] \quad (28)$$

$$= \mathbb{E}_{(X_0, X_1) \sim \gamma^*} [\|X_0 - X_1\|^2] \quad (29)$$

$$\geq \mathbb{E}_{(X_0, X_1) \sim \gamma^*} [\|X_0 - \mathbb{E}(X_0 | X_1)\|^2] \quad (30)$$

$$= \mathbb{E}_{(X_0, \hat{X}_0) \sim \pi^*} [\|X_0 - \hat{X}_0\|^2] \quad (31)$$

$$\geq \inf_{\pi \in \Pi(\rho_0, \hat{\rho}_0)} \mathbb{E}_{(X_0, \hat{X}_0) \sim \pi} [\|X_0 - \hat{X}_0\|^2] \quad (32)$$

$$= W_2^2(\rho_0, \hat{\rho}_0) \quad (33)$$

$\square$

## 9. Hyperparameters in Eq. 5

This section outlines the selection of hyperparameters  $\alpha$  and  $k$  in Eq. (5). The parameter  $k$  controls the overall scale

of the stochastic term. We calibrate  $k$  so that the maximum amplitude of the stochastic term in Eq. (5) closely matches that of I2SB [21] in Eq. (2). This alignment follows the empirical setup of prior work, as neither our method nor I2SB [21] systematically investigates the effect of the stochastic term’s magnitude on generation quality. A comprehensive analysis of this effect will be explored in future work.

The value of  $\alpha$  in the mean term is theoretically constrained to the range  $(0, 1)$ , based on noise alignment considerations. We empirically determine its optimal value through systematic experiments, with quantitative results presented in Tab. 6. Considering the performance across all metrics, we select  $\alpha = 0.4$ .

## 10. Supplement the Experimental and Qualitative Results

### 10.1. Compare with PMRF

We conducted a systematic comparison between the NADB and the Flow Matching-based PMRF [26] method under three different types of noise, using identical network architectures and strictly adhering to the original hyperparameters. As shown in Tab. 5, the PMRF [26] method exhibits instability at higher NFE values. This result underscores the advantage of the diffusion bridge approach and highlights the importance of our research into the endpoint fitting problem.

Table 6. Hyperparameter tuning using JPEG restoration tasks, QF=5.

| JPEG Restoration |          |      |       |       |        |
|------------------|----------|------|-------|-------|--------|
| NFE              | $\alpha$ | FID↓ | PSNR↑ | SSIM↑ | LPIPS↓ |
| 10               | 0.3      | 8.2  | 24.60 | 0.70, | 0.30   |
|                  | 0.4      | 6.9  | 24.45 | 0.69  | 0.30   |
|                  | 0.5      | 7.1  | 24.44 | 0.69  | 0.30   |
| 100              | 0.3      | 4.5  | 23.76 | 0.66  | 0.30   |
|                  | 0.4      | 4.3  | 23.63 | 0.65  | 0.30   |
|                  | 0.5      | 4.4  | 23.56 | 0.64  | 0.31   |

Table 7. Comparisons with additional baselines.

| (a) Deblurring, kernel=uniform |     |      |       |       |        | (b) Edges2Handbags (256×256) |       |       |        |
|--------------------------------|-----|------|-------|-------|--------|------------------------------|-------|-------|--------|
| Method                         | NFE | FID↓ | PSNR↑ | SSIM↑ | LPIPS↓ | Method                       | PSNR↑ | SSIM↑ | LPIPS↓ |
| I3SB                           | 10  | 6.5  | 24.17 | 0.65  | 0.32   | NADB                         | 19.25 | 0.740 | 0.231  |
| NADB                           |     | 4.8  | 27.70 | 0.81  | 0.18   | RDBM                         | 19.26 | 0.738 | 0.224  |
| I3SB                           | 100 | 4.9  | 22.70 | 0.58  | 0.33   | GOUB                         | 16.58 | 0.700 | 0.288  |
| NADB                           |     | 3.4  | 27.39 | 0.80  | 0.17   | RDDM                         | 14.66 | 0.645 | 0.256  |

  

| (c) Comparison on DrealSR dataset, NFE=40 |        |        |         |          |       |
|-------------------------------------------|--------|--------|---------|----------|-------|
| Method                                    | LPIPS↓ | MUSIQ↑ | MANIQA↑ | ClipIQA↑ | LIQE↑ |
| NADB                                      | 0.315  | 71.480 | 0.483   | 0.576    | 3.610 |
| DiT4SR                                    | 0.365  | 64.950 | 0.627   | 0.548    | 3.964 |

## 10.2. Additional Results

Tab. 7 provides additional image restoration, image translation, and super-resolution comparison experiments. Fig. 9 to 11 provide additional qualitative results on each restoration tasks, Fig. 12, 13 provide additional qualitative results on each translation tasks, and Fig. 14 provides additional examples comparing between NADB and I2SB w.r.t. various NFE sampling.

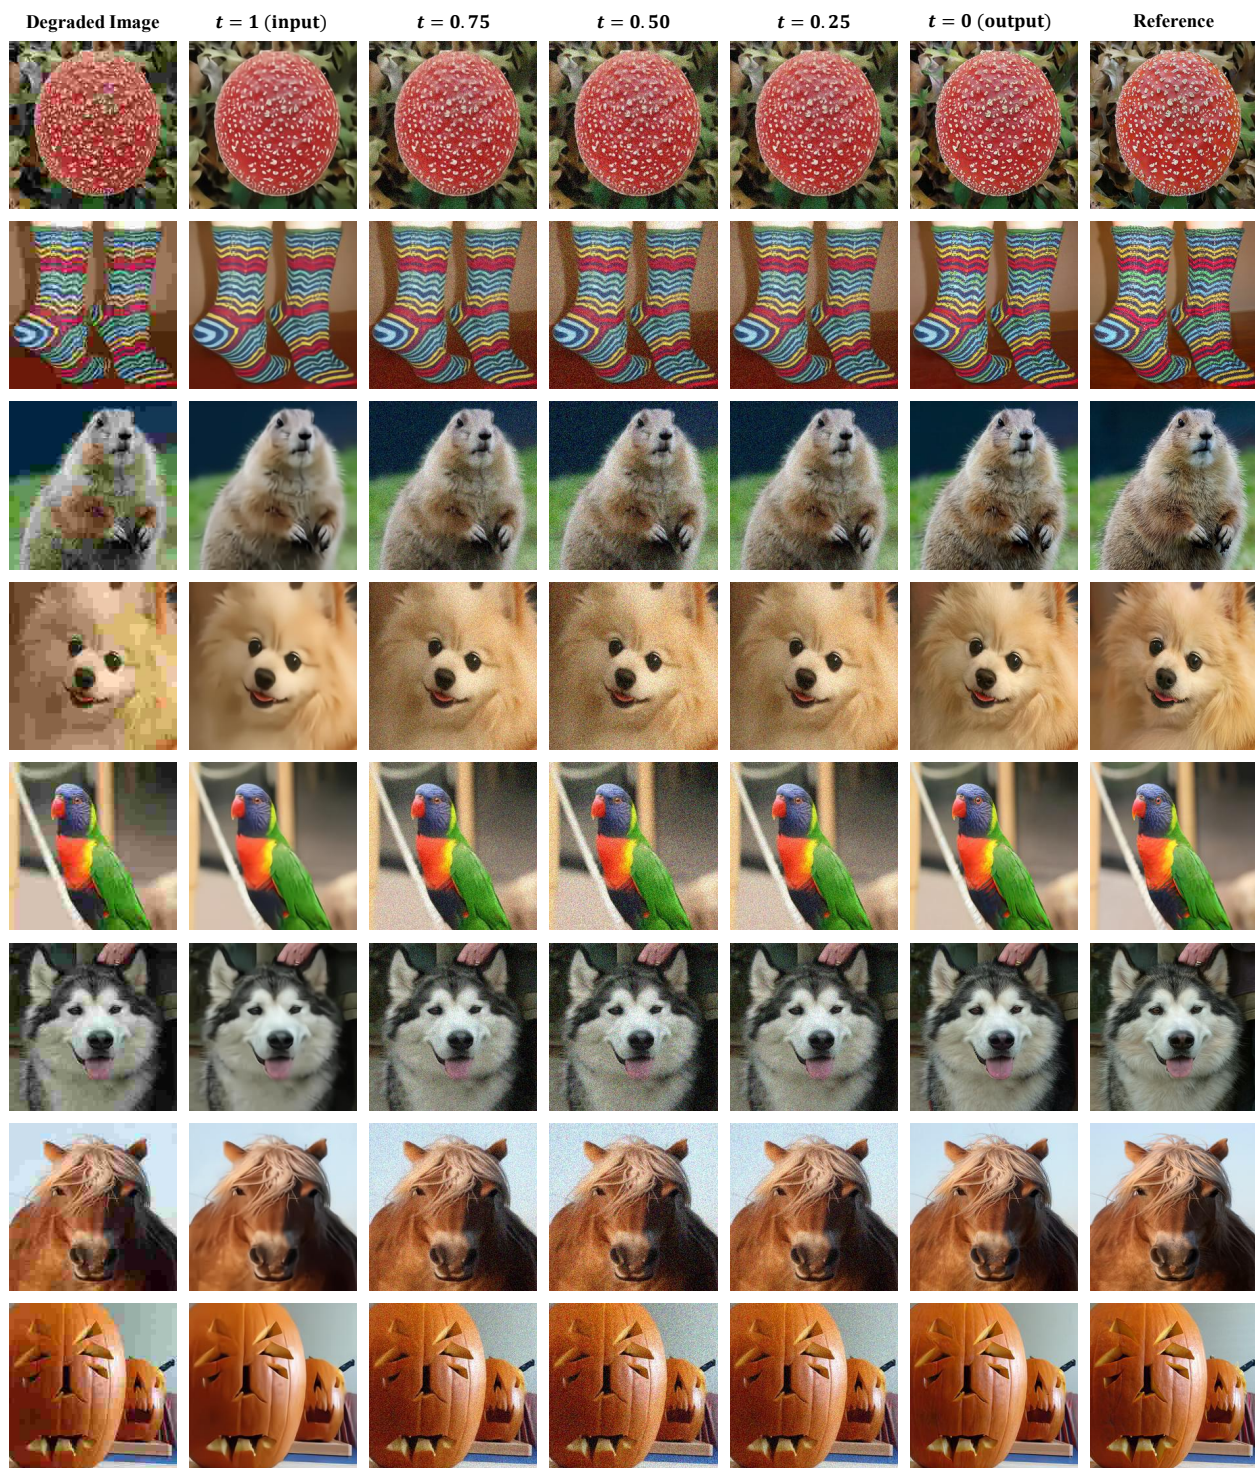

Figure 9. Generative processes of NADB on JPEG restoration tasks. **Top 4 rows:** QF=5. **Bottom 3 rows:** QF=10.

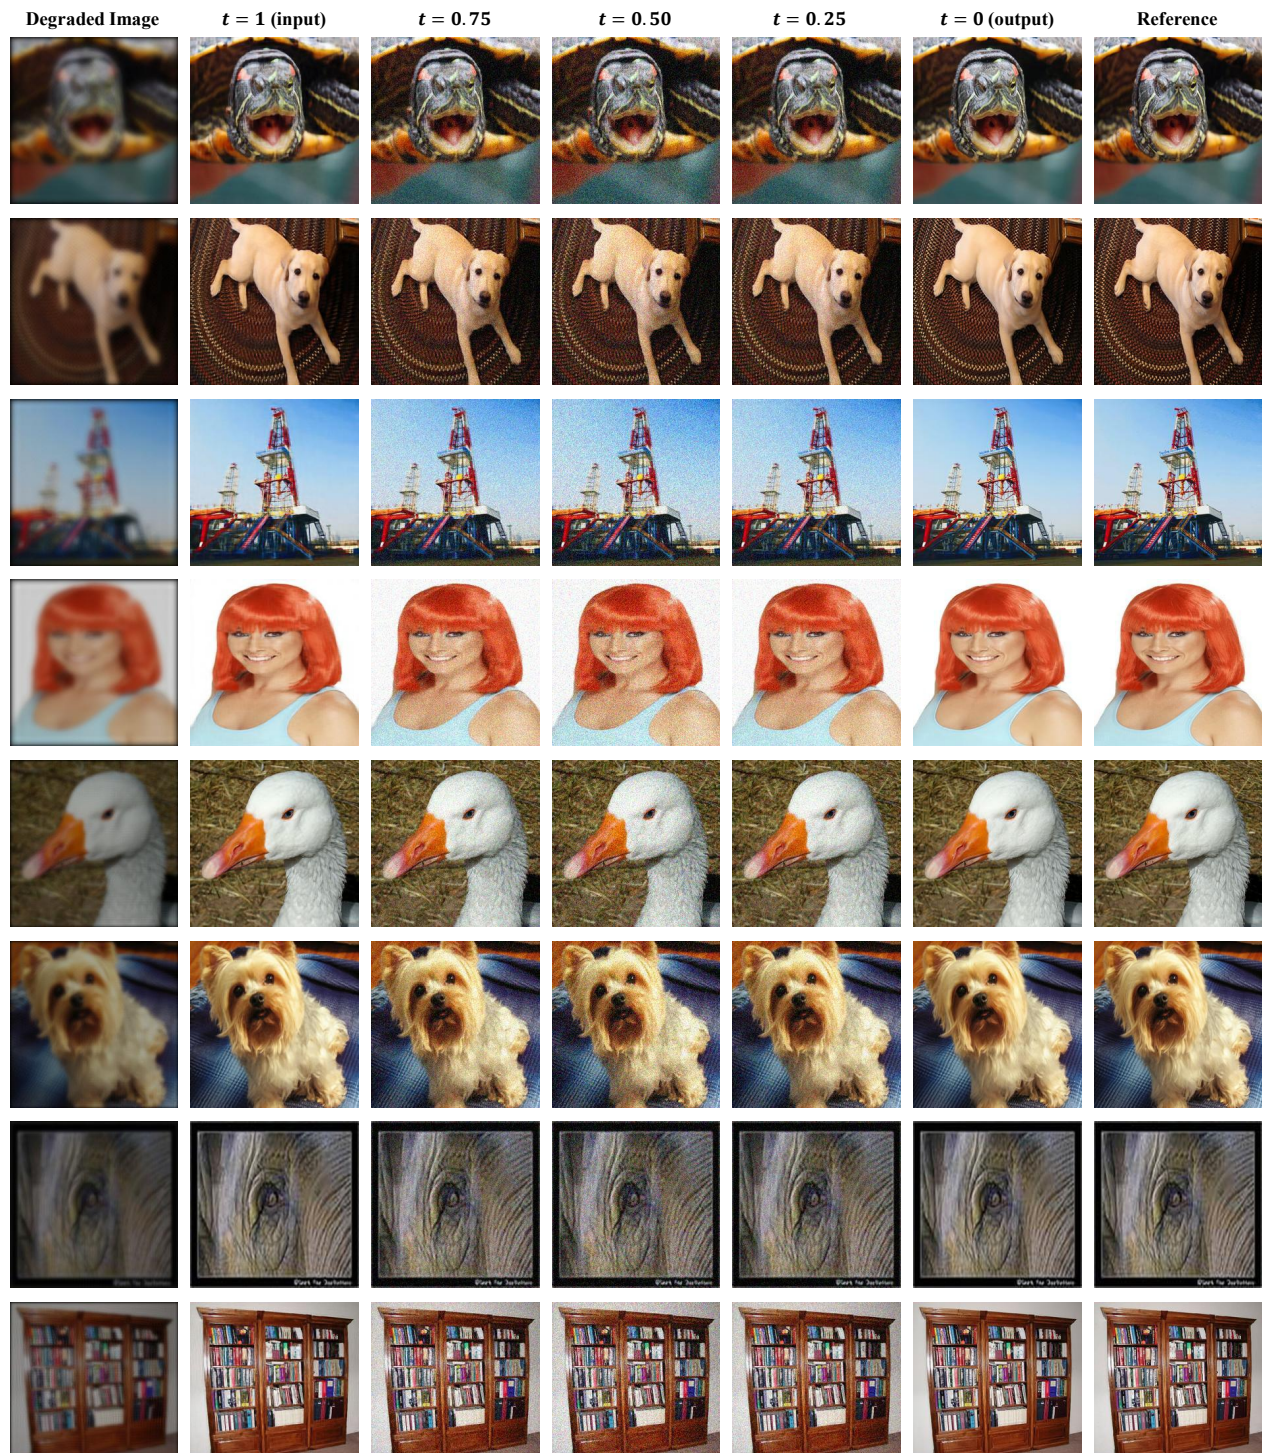

Figure 10. Generative processes of NADB on deblurring tasks. **Top 4 rows:** Uniform kernel. **Bottom 4 rows:** Gaussian kernel.

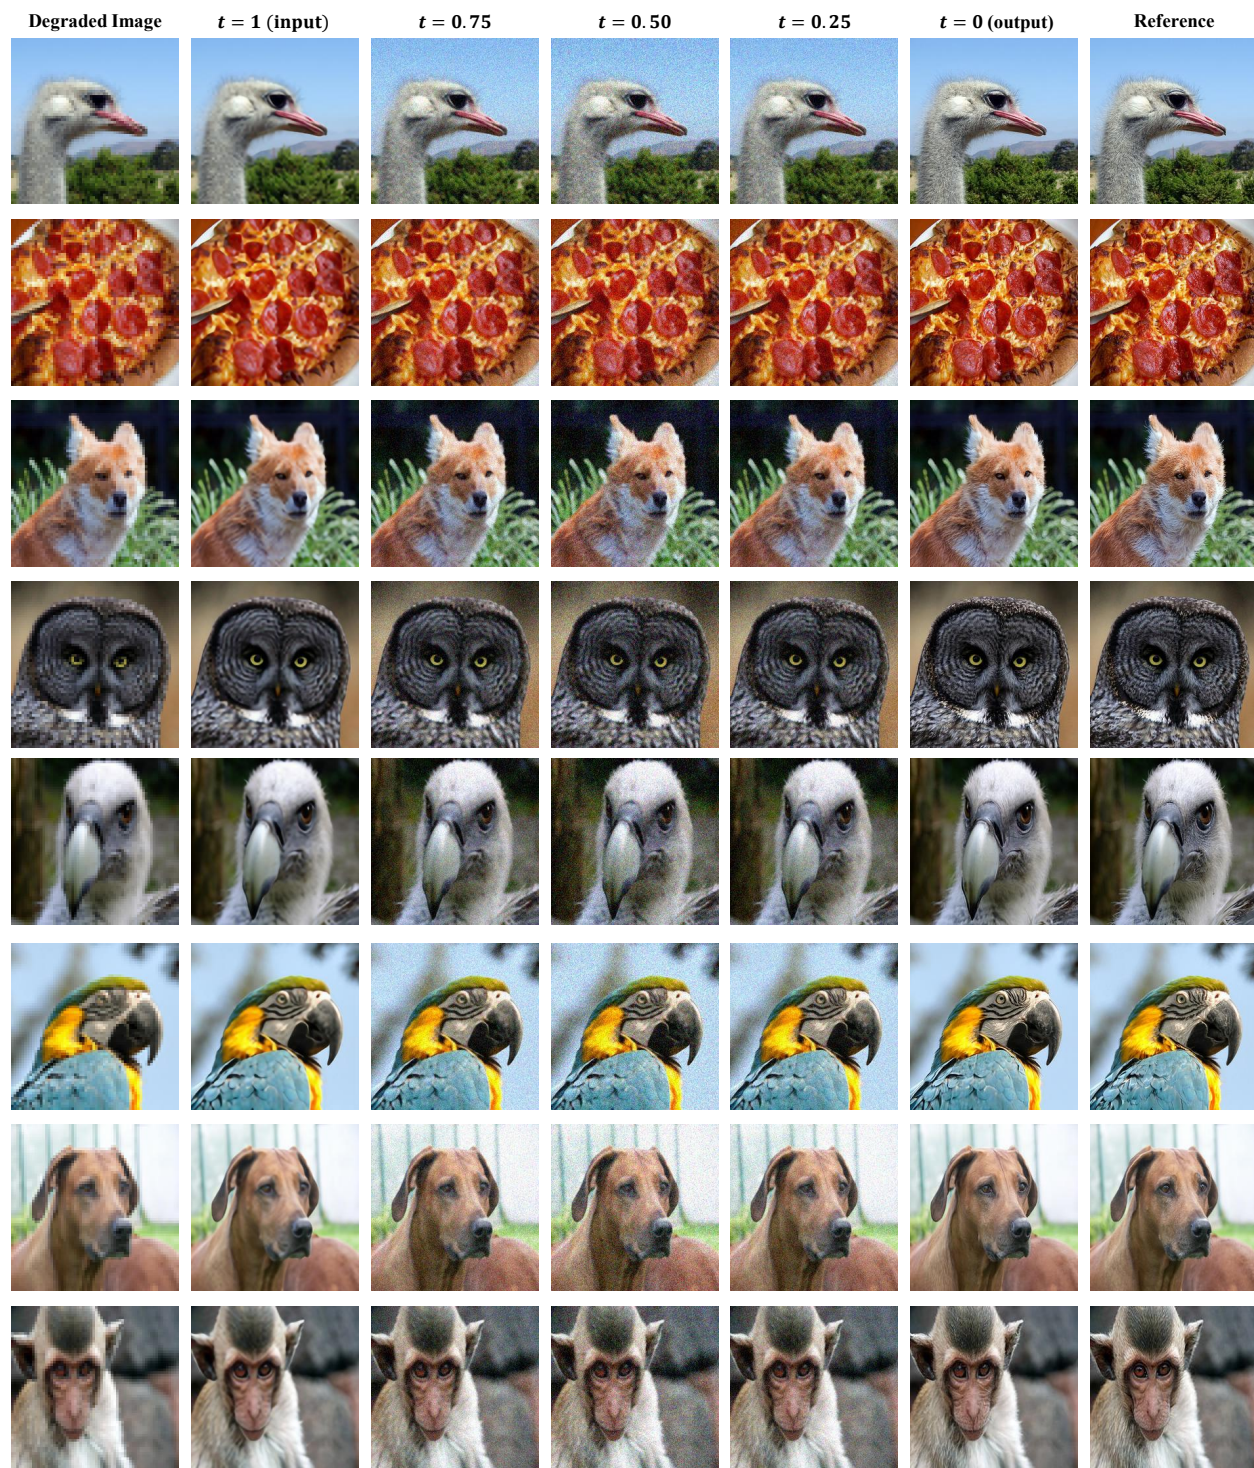

Figure 11. Generative processes of NADB on  $4 \times$  super-resolution tasks. **Top 4 rows:** Pool kernel. **Bottom 4 rows:** Bicubic kernel.

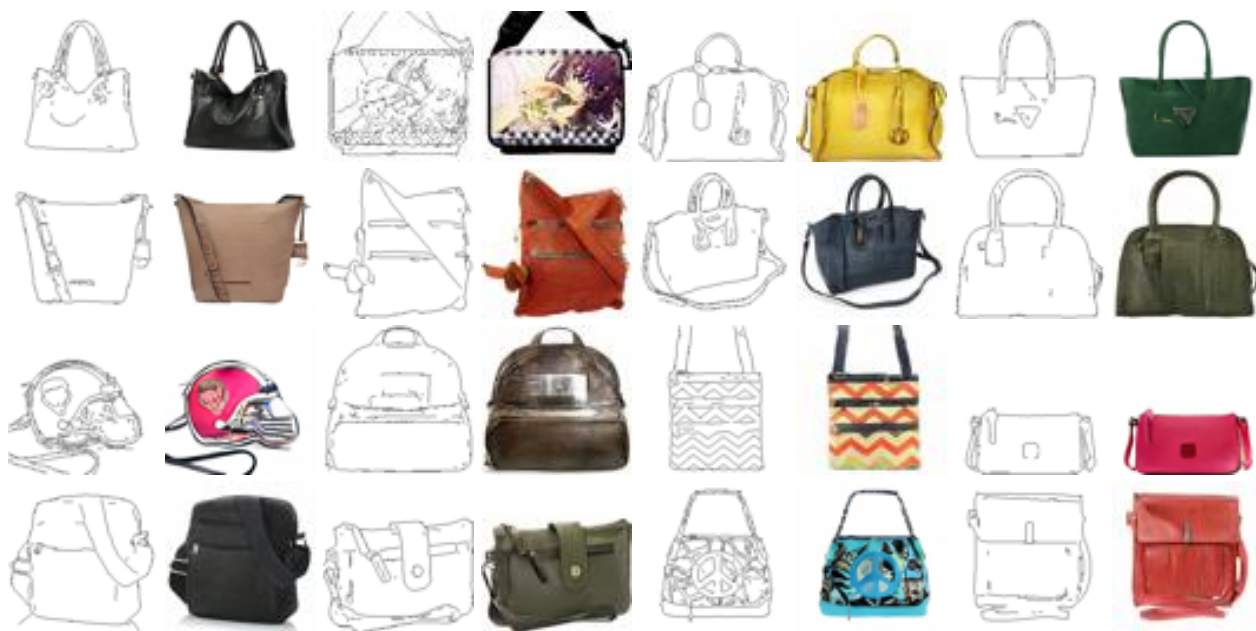

Figure 12. Generate results on edges2handbags dataset with resolution  $64 \times 64$ .

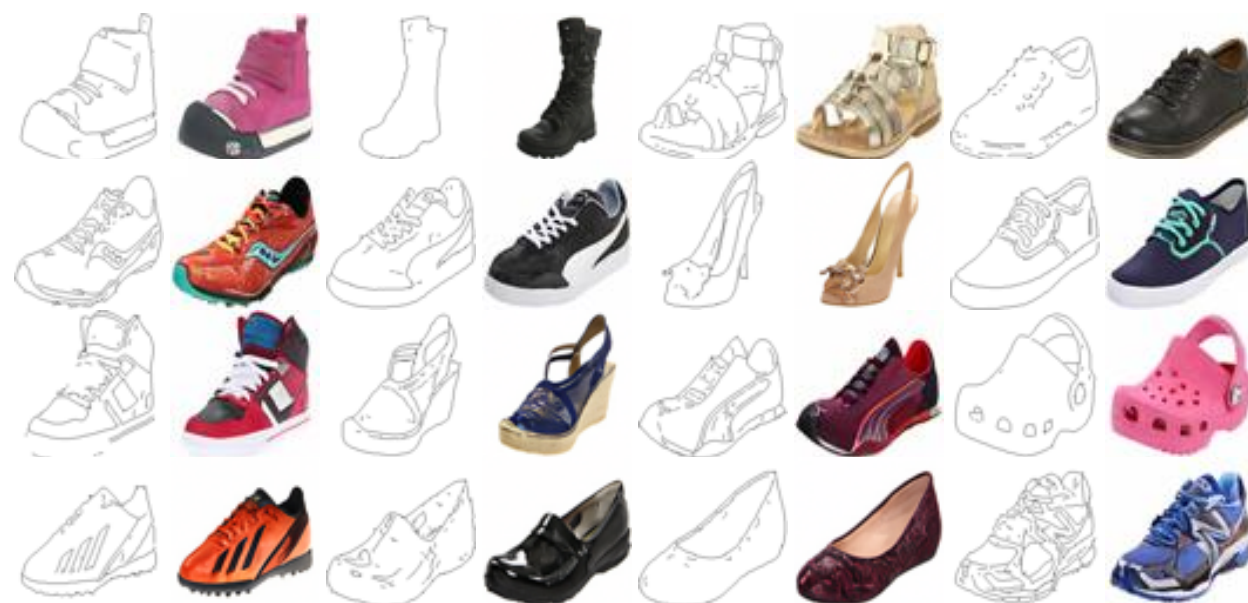

Figure 13. Generate results on edges2shoes dataset with resolution  $64 \times 64$ .

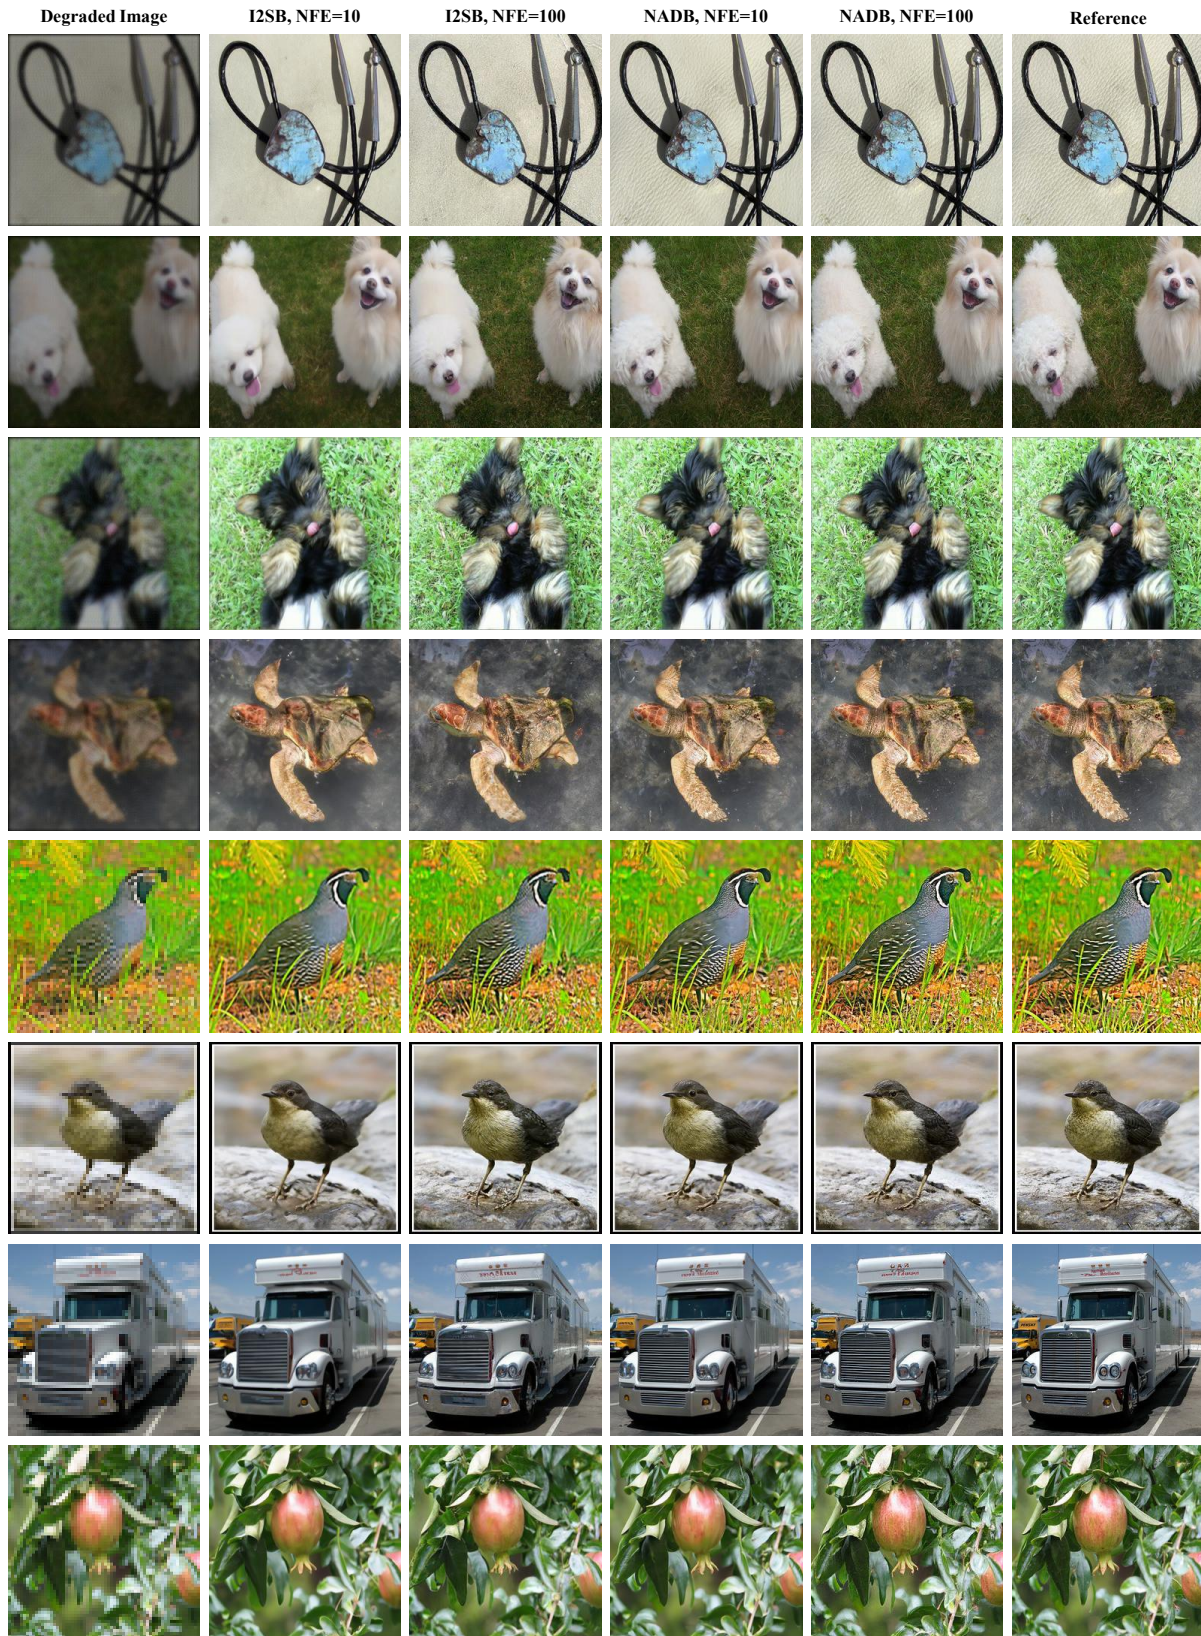

Figure 14. Additional qualitative comparison between NADB and I2SB. **Top 4 rows:** Deblurring tasks with gaussian kernel. **Bottom 4 rows:**  $4 \times$  super-resolution tasks with pool kernel.
